# Supplementary material for: Structure, function, and control of the human musculoskeletal network
Source: PLoS Biol. 2018 Jan 18;16(1):e2002811. doi: 10.1371/journal.pbio.2002811 (PMC5773011; doi:10.1371/journal.pbio.2002811)
Supplement: S5 Table — This null model required randomly assigning muscle–bone connections, only preserving overall degree and not individual muscle degree. The muscles on the left side have less impact than expected, given their hyperedge degree: their impacts are more than 1.96 standard deviations below the mean, indicating that they lie outside the 95% CI of the distribution. The muscles on the right side have more impact than expected, given their hyperedge degree: their impacts are more than 1.96 standard deviations above the mean and are ordered from most to least extreme. (XLSX) [file pbio.2002811.s012.xlsx]

## Sheet: Sheet1
Rank order	Less impact than expected		More impact than expected
#	Hyperedge	Muscle name	Hyperedge	Muscle name
1			2	Latissimus Dorsi
2			23	Pronator Teres
3			33	Extensor carpi radialus brevis
4			22	Anconeus
5			16	Pectoralis Major
6			37	Supinator
7			20	Brachialis
8			31	Brachioradialis
