# Supplementary material for: Structure, function, and control of the human musculoskeletal network
Source: PLoS Biol. 2018 Jan 18;16(1):e2002811. doi: 10.1371/journal.pbio.2002811 (PMC5773011; doi:10.1371/journal.pbio.2002811)
Supplement: S6 Table — Here, we include the muscle name (column 1), the muscle volume (in cm3; column 2), and the reference from which the estimate was taken. (XLSX) [file pbio.2002811.s013.xlsx]

## Sheet: Sheet1
Muscle	Volume (cm3)	Reference
Gluteus maximus	764.1	Lube (2016)
Gluteus medius	287.6	Lube (2016)
Gluteus minimus	77.1	Lube (2016)
Piriformis	27.3	Lube (2016)
Gemelli	9.3	Lube (2016)
Quadratus femoris	38.4	Lube (2016)
Semitendinosus	103	Lube (2016)
Semimembranous	210.2	Lube (2016)
Biceps femoris	269.8	Lube (2016)
Adductor longus	107.8	Lube (2016)
Adductor brevis	79.8	Lube (2016)
Adductor magnus	388.8	Lube (2016)
Gracilis	75.4	Lube (2016)
Sartorius	126.7	Lube (2016)
Rectus femoris	212.3	Lube (2016)
Vastus lateralis	503.2	Lube (2016)
Vastus intermedius	395.9	Lube (2016)
Vastus medialis	306	Lube (2016)
Psoas major	274.8	Handsfield (2014)
Iliacus	176.8	Handsfield (2014)
Pectineus	43.9	Lube (2016)
Gastrocnemius	231.4	Belavy (2010)
Soleus	490.3	Belavy (2010)
Popliteus	10.3	Lube (2016)
Tibialis posterior	110.4	Belavy (2010)
Tibialis anterior	f135.2	Handsfield (2014)
